# Supplementary material
Source: publisher figshare collection journal article supplement (https://acs.figshare.com/ndownloader/files/3968878)
Supplement: Supplementary file 1 [file 3968878]

## Sheet: S5_GO_processes
Gene ontology (GO) biological process	P-value	No. of Genes
GO:0009765 photosynthesis, light harvest	1.83e-10	10
GO:0006091 generation of precursor metabolites and energy	2.75e-09	44
GO:0055114 oxidation-reduction process	2.54e-07	43
GO:1901576 organic substance biosynthesis	5.31e-06	81
GO:0042592 homeostatic process	3.7e-06	12*
GO:0022900 electron transport chain	1.31e-05	26
GO:0001121 transcription (RNA polymerase)	5.49e-05	4
GO:0055072 iron ion homeostasis	0.000206	5
GO:0009099 valine biosynthesis	0.000636	3
GO:0000988 heme biosynthesis	0.000988	6
GO:006979 response to oxidative stress	0.003	12
GO:0006412 translation	0.006	20
GO enrichment was estimated by Fisher Exact of Biological Process assignments in SynPCC7002Cyc
* dsbAB, fur, futA, futC, grxB, isiA, sufA, trxA, trxB, trxQ, A0320, A0793
